# Supplementary material
Source: PubMed Central journal article supplement (PMC5784472)
Supplement: DS_10.1177_0022034517729322.pdf [file DS_10.1177_0022034517729322.pdf]

## Nine Novel *PAX9* Mutations and a Distinct Tooth Agenesis Genotype-Phenotype

S.-W. Wong, D. Han, H. Zhang, Y. Liu, X. Zhang, M.Z. Miao, Y. Wang, N. Zhao, L. Zeng, B. Bai, Y.-X. Wang, H. Liu, S.A.

Frazier-Bowers, and H. Feng

### Appendix

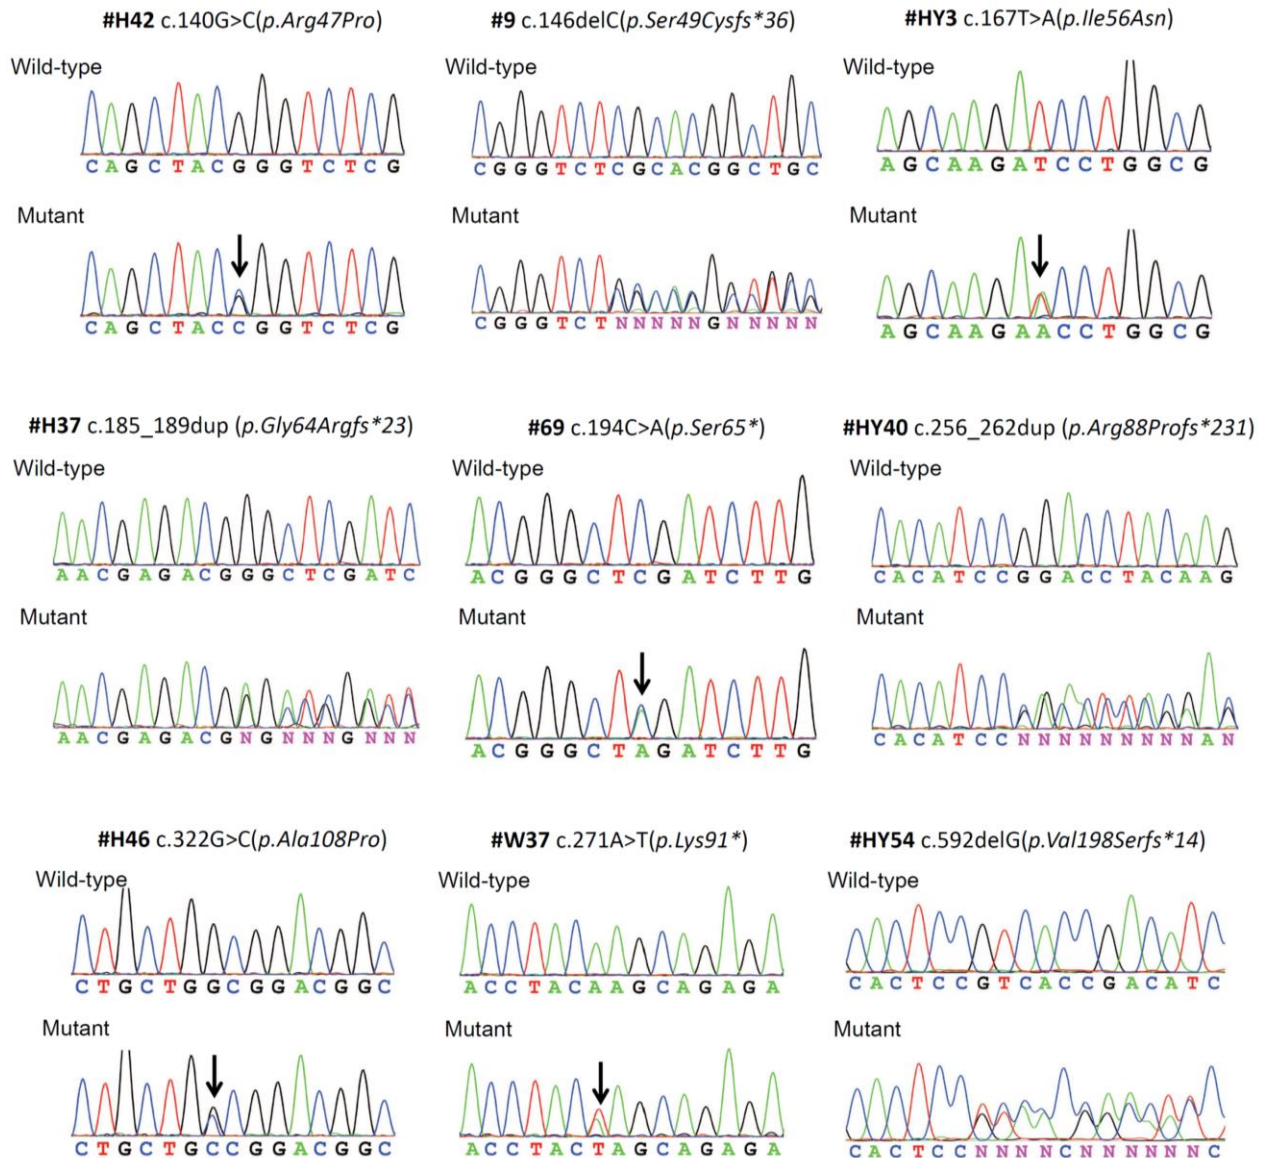

**Appendix Figure 1.** Nine novel *PAX9* mutations found in patients with tooth agenesis. DNA sequencing chromatograms of the novel *PAX9* mutations. Arrowheads indicate point mutations.

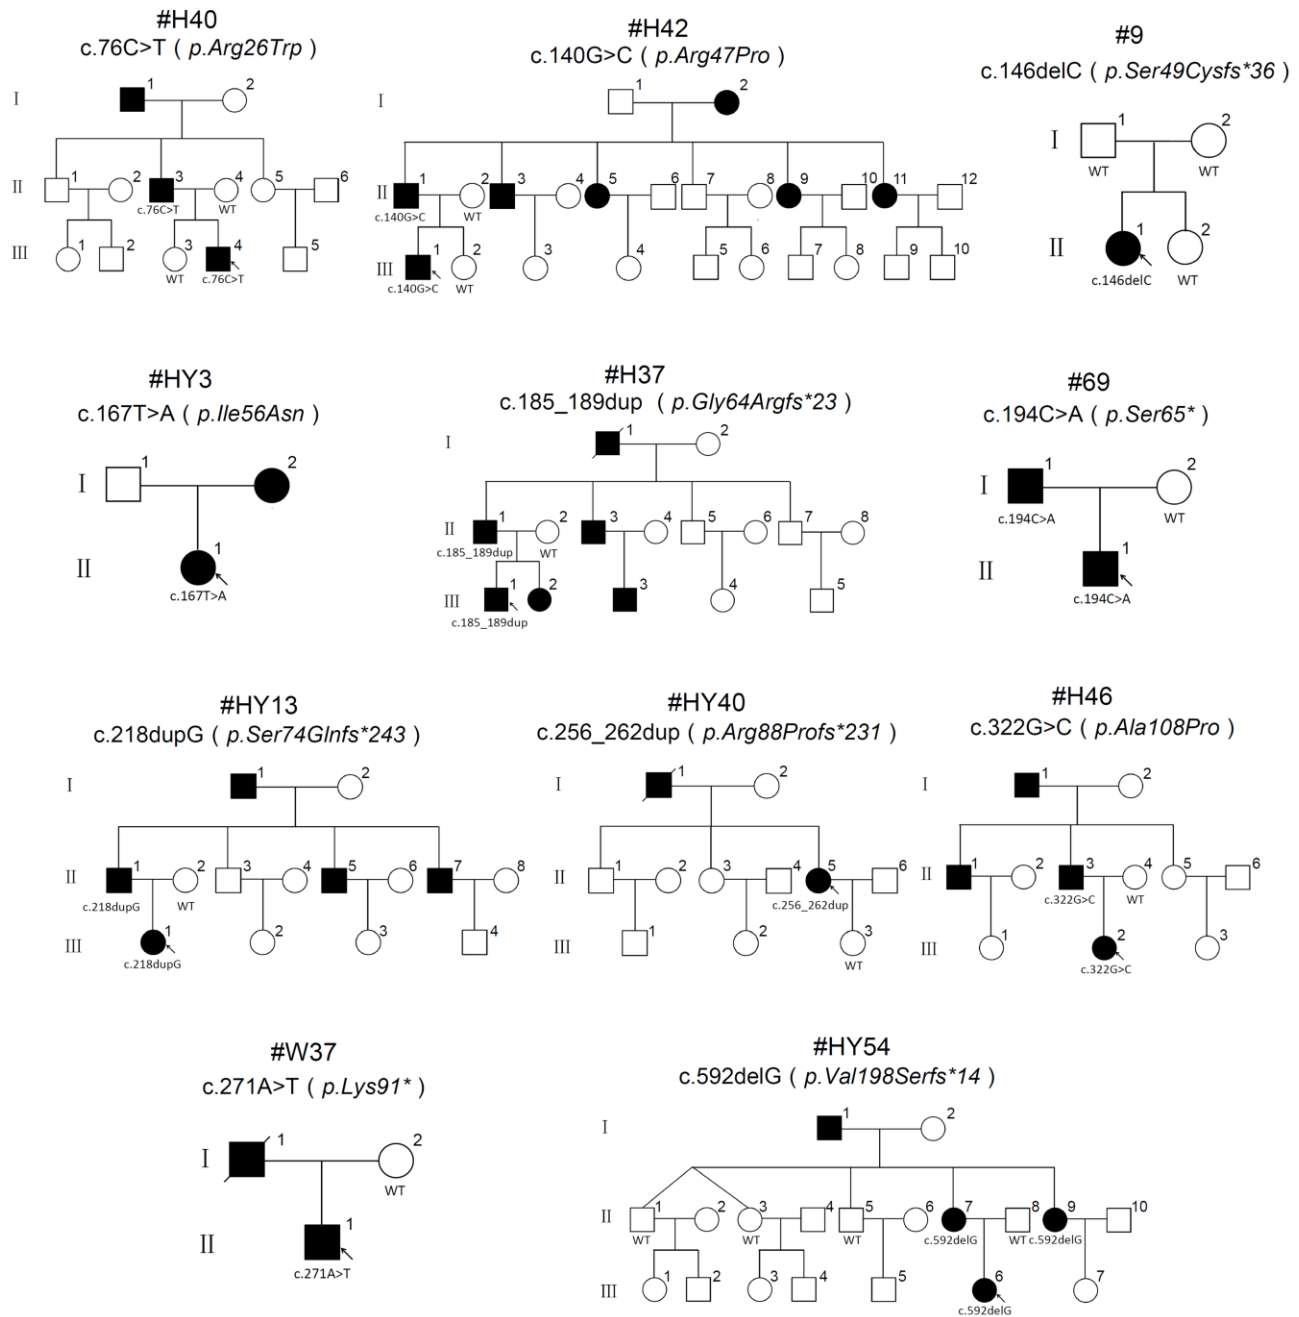

**Appendix Figure 2.** Pedigrees of tooth agenesis patients with a *PAX9* mutation. Filled circles and squares indicate affected females and males family members, respectively. Arrows indicates the proband of a family.

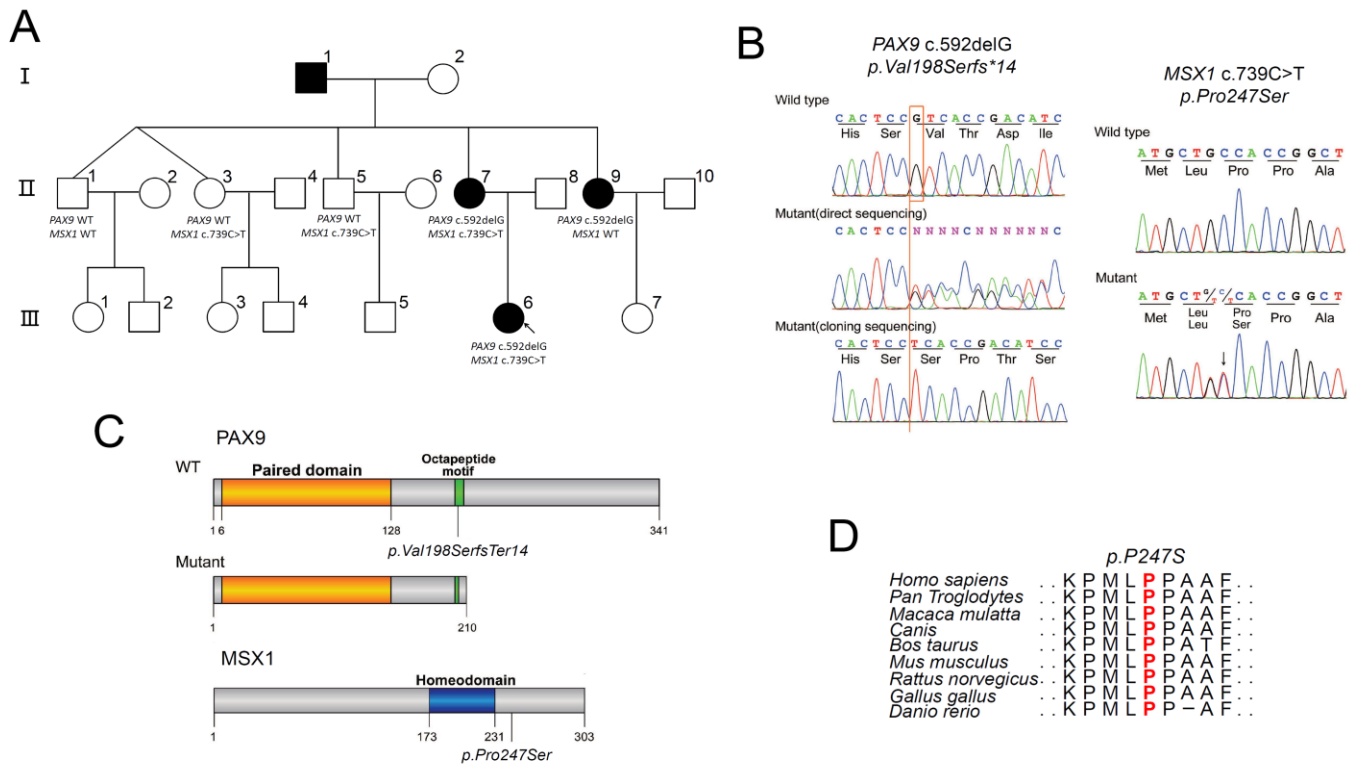

**Appendix Figure 3.** The tooth agenesis patient with *PAX9* and *MSX1* digenic mutations. (A) The pedigree of the patient with digenic mutations. (B) DNA sequencing chromatograms of *PAX9* c.592delG and *MSX1* c.739C>T mutations. PCR products harboring the c.592delG frameshift mutation were cloned into pGEM-T Easy Vectors (Tiangen, Beijing, China) to exclusively sequence the mutant allele. (C) Schematic pictures of mutant *PAX9* and *MSX1*. (D) Conservation analysis of residue 247 in *MSX1* among nine different vertebrate species.

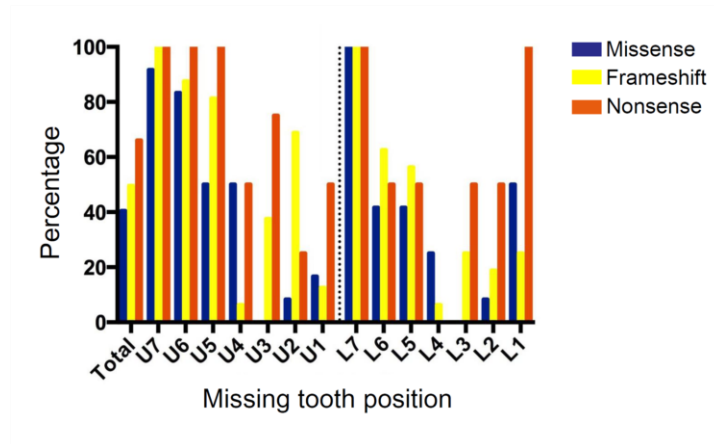

**Appendix Figure 4.** The prevalence of missing teeth in patients with different types of *PAX9* mutations (missense, frameshift and nonsense mutations).

**Appendix Table 1**

Schematic presentation of congenital missing permanent teeth/microdontia in patients with a *PAX9* mutation

■ = the missing tooth; △ = microdontia; □ = unaffected teeth

| Family/<br>Patient # | Genotype                                      | Mutation   | Right quadrants |   |   |   |   |   |   | Left quadrants |   |   |   |   |   |   |   |
|----------------------|-----------------------------------------------|------------|-----------------|---|---|---|---|---|---|----------------|---|---|---|---|---|---|---|
|                      |                                               |            | Max             | 7 | 6 | 5 | 4 | 3 | 2 | 1              | 1 | 2 | 3 | 4 | 5 | 6 | 7 |
|                      |                                               |            | Mand            | 7 | 6 | 5 | 4 | 3 | 2 | 1              | 1 | 2 | 3 | 4 | 5 | 6 | 7 |
| H40 III:4            | <i>PAX9</i> c.76C>T                           | Missense   | ■               | ■ | □ | □ | □ | △ | □ | □              | ■ | □ | □ | ■ | ■ | ■ |   |
| H40 II:3             | <i>PAX9</i> c.76C>T                           | Missense   | ■               | ■ | □ | □ | □ | □ | □ | □              | □ | □ | □ | □ | ■ | ■ |   |
| H42 III:1            | <i>PAX9</i> c.140G>C                          | Missense   | ■               | ■ | ■ | ■ | △ | □ | □ | □              | □ | △ | ■ | ■ | ■ | ■ |   |
| H42 II:1             | <i>PAX9</i> c.140G>C                          | Missense   | ■               | □ | □ | ■ | □ | □ | ■ | ■              | □ | □ | ■ | □ | □ | ■ |   |
| 9 II:1               | <i>PAX9</i> c.146delC                         | Frameshift | ■               | ■ | ■ | □ | ■ | ■ | △ | △              | △ | △ | □ | ■ | ■ | ■ |   |
| HY3 II:1             | <i>PAX9</i> c.167T>A                          | Missense   | ■               | ■ | ■ | ■ | □ | □ | □ | □              | △ | □ | □ | ■ | ■ | ■ |   |
| H37 III:1            | <i>PAX9</i> c.185_189dup                      | Frameshift | ■               | ■ | □ | □ | □ | ■ | △ | △              | ■ | □ | □ | ■ | ■ | ■ |   |
| H37 II:1             | <i>PAX9</i> c.185_189dup                      | Frameshift | ■               | ■ | ■ | □ | ■ | ■ | ■ | △              | ■ | □ | □ | ■ | ■ | ■ |   |
| 69 II:1              | <i>PAX9</i> c.194C>A                          | Nonsense   | ■               | ■ | ■ | ■ | ■ | △ | △ | △              | ■ | ■ | ■ | ■ | ■ | ■ |   |
| HY13 III:1           | <i>PAX9</i> c.218dupG                         | Frameshift | ■               | ■ | ■ | ■ | △ | ■ | △ | □              | ■ | △ | ■ | ■ | ■ | ■ |   |
| HY13 II:1            | <i>PAX9</i> c.218dupG                         | Frameshift | ■               | △ | □ | □ | ■ | □ | □ | □              | □ | ■ | □ | □ | △ | ■ |   |
| HY40 II:5            | <i>PAX9</i> c.256_262dup                      | Frameshift | ■               | ■ | ■ | □ | □ | □ | □ | □              | □ | □ | □ | □ | □ | ■ |   |
| H46 III:2            | <i>PAX9</i> c.322G>C                          | Missense   | □               | ■ | □ | □ | □ | △ | △ | △              | △ | □ | □ | ■ | ■ | ■ |   |
| W37 II:1             | <i>PAX9</i> c.271A>T                          | Nonsense   | ■               | ■ | ■ | □ | ■ | △ | ■ | ■              | ■ | ■ | △ | □ | ■ | ■ |   |
| HY54 III:6           | <i>PAX9</i> c.592delG<br><i>MSX1</i> c.739C>T | Frameshift | ■               | ■ | ■ | □ | □ | ■ | □ | □              | ■ | □ | □ | ■ | ■ | ■ |   |
| HY54 II:7            | <i>PAX9</i> c.592delG<br><i>MSX1</i> c.739C>T | Frameshift | ■               | ■ | ■ | □ | ■ | ■ | ■ | □              | ■ | ■ | □ | ■ | ■ | ■ |   |

**Appendix Table 2.** Percentage of missing teeth and microdontia in different types of *PAX9* mutation

|               | <b>Missense</b> | <b>Frameshift</b> | <b>Nonsense</b> | <b><i>P</i> Value</b> |
|---------------|-----------------|-------------------|-----------------|-----------------------|
| Missing tooth | 40.5%           | 49.6%             | 66.1%           | 0.004                 |
| Microdontia   | 4.76%           | 9.80%             | 9.80%           | <0.001                |

Chi-square test was used to determine the differences among groups.

**Appendix Table 3.** Comparison of the taste score between patients with a PAX9 mutation and controls

|             | <b>Patient</b>   | <b>Control</b>   | <b>P value</b> |
|-------------|------------------|------------------|----------------|
|             | <b>Mean (SD)</b> | <b>Mean (SD)</b> |                |
| Sweet       | 3.67 (0.52)      | 3.70 (0.43)      | 0.91           |
| Bitter      | 2.33 (0.82)      | 3.35 (0.87)      | 0.024          |
| Salty       | 3.67 (0.52)      | 3.45 (0.68)      | 0.55           |
| Sour        | 3.50 (0.84)      | 3.60 (0.57)      | 0.78           |
| Total score | 26.33 (1.52)     | 28.20 (3.48)     | 0.39           |

Three available patients with *PAX9* mutations (c.140G>C, c.140G>C and c.322G>C) were recruited to participate in this experiment; age-match healthy control N=10. Mann–Whitney test was used to determine the differences between groups.
